# Supplementary material
Source: Springer Nature journal article supplement (https://www.springerprofessional.de/resource/supplementary/13638_2012_589_MOESM11_ESM.pdf/11898706)
Supplement: MOESM11 [file 11898706]

|                                        |              |              |              |              |              |              |
|----------------------------------------|--------------|--------------|--------------|--------------|--------------|--------------|
| <b>Offered Traffic Load</b>            | <b>88,62</b> | <b>90,39</b> | <b>92,23</b> | <b>94,15</b> | <b>96,16</b> | <b>98,25</b> |
| <b>FEI</b>                             | 80,16        | 81,12        | 82,27        | 83,24        | 84,19        | 87,29        |
| <b>HPS</b>                             | 47,7         | 48           | 48,61        | 48,88        | 49,07        | 50,38        |
| <b>Relative Percentage of Increase</b> | 68,05        | 68,99        | 69,24        | 70,3         | 71,57        | 73,24        |
